# Supplementary material for: Unveiling the urban colonization of the Asian water monitor (Varanus salvator) across its distribution range using citizen science
Source: PeerJ journal article supplement (doi:10.7717/peerj.17357), 2024-08-22
Supplement: Supp_mat_final.pdf [file Supp_mat_final.pdf]

SP1. Flow diagram showing the sequential steps developed in conducting the revision, including the descriptive results.

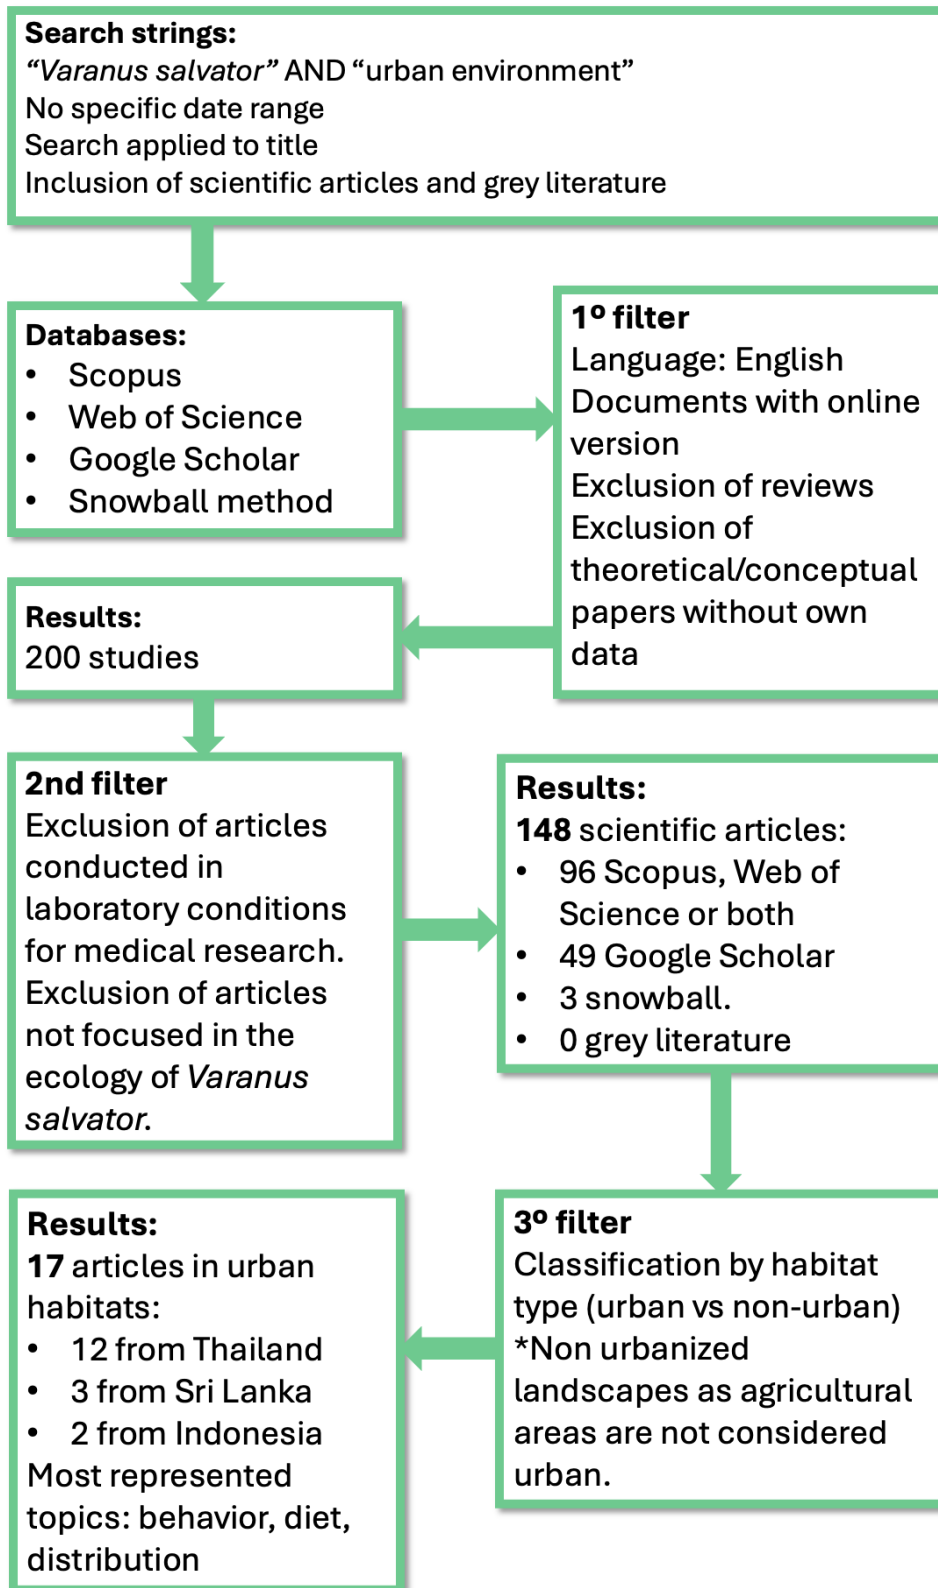

**SP2. Criteria used for classifying literature reviewed by topic.**

| <b>Topic</b>      | <b>Description</b>                                                                                                  |
|-------------------|---------------------------------------------------------------------------------------------------------------------|
| Behavior          | When the study describes aspects of its reproductive, hunting or agonistic behavior.                                |
| Diet              | When the study describes prey or carrion that the Asian water monitors consume.                                     |
| Physiology        | When the study deals with thermal physiology, hormones or some other aspect regarding its biological functioning.   |
| Distribution      | When the study explores how the species is distributed in different regions or ecosystems within their native area. |
| Habitat selection | When the study focuses on how the species occurs or is absent in a given habitat or microhabitat.                   |
| Parasitology      | When the study offers information on ecto- and/or endoparasites found in the species.                               |
| Conservation      | When the study analyzes concerns and threats related to the Asian water monitor conservation                        |

**SP3.** Summary with all the references retained in reviewed in the literature revision. Urban Ecology works appear first with bold letters. WOS= Web of Science. Other includes Google Scholar.

| <u>N</u> | <u>Reference</u>                                                                                                                                                                                                                                                                                                                                                                                                                                               | <u>Year</u> | <u>Country</u> | <u>Source</u> |
|----------|----------------------------------------------------------------------------------------------------------------------------------------------------------------------------------------------------------------------------------------------------------------------------------------------------------------------------------------------------------------------------------------------------------------------------------------------------------------|-------------|----------------|---------------|
| 1        | Kulabtong, S., & Mahaprom, R. (2015). Observation on food items of Asian water monitor, <i>Varanus salvator</i> (Laurenti, 1768)(Squamata Varanidae), in urban eco-system, Central Thailand. <i>Biodiversity Journal</i> , 6, 695-698.                                                                                                                                                                                                                         | 2015        | Thailand       | Other         |
| 2        | Stanner, M. (2010). Mammal-like feeding Behavior of <i>Varanus salvator</i> and its Conservational implications. <i>Biawak</i> , 4(4), 128-131.                                                                                                                                                                                                                                                                                                                | 2010        | Thailand       | Other         |
| 3        | Wongtienchai, P., Lapbenjakul, S., Jangtarwan, K., Areesirisuk, P., Mahaprom, R., Subpayakom, N., ... & Srikulnath, K. (2021). Genetic management of a water monitor lizard ( <i>Varanus salvator macromaculatus</i> ) population at Bang Kachao Peninsula as a consequence of urbanization with Varanus Farm Kamphaeng Saen as the first captive research establishment. <i>Journal of Zoological Systematics and Evolutionary Research</i> , 59(2), 484-497. | 2021        | Thailand       | WOS/Scopus    |
| 4        | Cota, M. (2011). Mating and Intraspecific Behavior of <i>Varanus salvator macromaculatus</i> in an Urban Population. <i>Biawak</i> , 5(1/2), 17-23.                                                                                                                                                                                                                                                                                                            | 2011        | Thailand       | Other         |
| 5        | Karunaratna, S., Surasinghe, T., Madawala, M., Somaweera, R., & Amarasinghe, A. T. (2017). Ecological and behavioural traits of the Sri Lankan water monitor ( <i>Varanus salvator</i> ) in an urban landscape of Western Province, Sri Lanka. <i>Marine and Freshwater Research</i> , 68(12), 2242-2252.                                                                                                                                                      | 2017        | Sri Lanka      | WOS/Scopus    |
| 6        | Cota, M. I. C. H. A. E. L., & Sommerlad, R. A. L. F. (2013). Notes and observations on the fish prey of <i>Varanus salvator macromaculatus</i> (Reptilia: Squamata: Varanidae) in Thailand with a review of the fish prey of the <i>Varanus salvator</i> complex known to date. <i>Biawak</i> , 7(2), 63-70.                                                                                                                                                   | 2013        | Thailand       | Other         |
| 7        | Cota, M. I. C. H. A. E. L. (2011). Burrows with submerged and waterfilled entrances and nocturnal retirement of <i>Varanus salvator macromaculatus</i> in Thailand. <i>Biawak</i> , 5(3), 44-47.                                                                                                                                                                                                                                                               | 2011        | Thailand       | Other         |

|    |                                                                                                                                                                                                                                                                                                                                                                 |      |           |          |
|----|-----------------------------------------------------------------------------------------------------------------------------------------------------------------------------------------------------------------------------------------------------------------------------------------------------------------------------------------------------------------|------|-----------|----------|
| 8  | Takano, A., Kuwata, R., Shimoda, H., Hadi, U. K., Setiyono, A., Agungpriyono, S., & Maeda, K. (2019). Detection and isolation of tick-borne bacteria ( <i>Anaplasma</i> spp., <i>Rickettsia</i> spp., and <i>Borrelia</i> spp.) in <i>Amblyomma varanense</i> ticks on lizard ( <i>Varanus salvator</i> ). <i>Microbiology and immunology</i> , 63(8), 328-333. | 2019 | Indonesia | Scopus   |
| 9  | Stanner, M. (2012). <i>Varanus salvator</i> swallowing a catfish - Another facet of the life-dinner principle? <i>Hamadryad</i> 36(1), pp. 38-41                                                                                                                                                                                                                | 2012 | Thailand  | Scopus   |
| 10 | LAWTON, D., PARLINDUNGAN, D., PRATAMA, A., ASWIN, P., JUNDARA, P., DARMAWAN, R., ... & MATTHEWS, C. E. (1998). Living Among Water Monitors: An Exploratory Study of an Urban Water Monitor ( <i>Varanus salvator</i> ) Population in Bengkulu, Indonesia. <i>Biawak</i> , 12(1), 42-47.                                                                         | 1998 | Indonesia | Other    |
| 11 | BARNES, C. H., TIPPRAPATKUL, W., HRADNANSKY, T., & BARNES, C. (2019). Mobbing Behavior by White-vented Mynas ( <i>Acridotheres javanicus</i> ) Towards a Southeast Asian Water Monitor ( <i>Varanus salvator macromaculatus</i> ). <i>Journal of Varanid Biology and Husbandry</i> , 13(1), 46-49.                                                              | 2019 | Thailand  | Other    |
| 12 | Hawkeswood, T. J., & Sommung, B. (2016). Observations on the reptile fauna of Lat Krabang Park, Bangkok, Thailand.                                                                                                                                                                                                                                              | 2016 | Thailand  | Other    |
| 13 | Hawkeswood, T. J., & Sommung, B. (2017). Observations on the reptile fauna of Queen Sirikit Park No. 9, Bangkok, Thailand.                                                                                                                                                                                                                                      | 2017 | Thailand  | Other    |
| 14 | Karunaratna, D. M. S. S., Amarasinghe, A. T., & De Vos, A. S. H. A. (2008). Preliminary notes on the Monitor lizards (Family: Varanidae) within the national Zoological Gardens (nZG) dehiwala, Colombo district, sri lanka. <i>Biawak</i> , 2(3), 109-118.                                                                                                     | 2008 | Sri Lanka | Other    |
| 15 | Mahaprom, R., & Kulabtong, S. Observation of feeding habit of the Asian water monitor, <i>Varanus salvator</i> (Laurenti, 1768)(Squamata Varanidae) on a Asian toad, <i>Duttaphrynus melanostictus</i> (Schneider, 1799)(Anura Bufonidae) in Thailand.                                                                                                          | 2018 | Thailand  | Other    |
| 16 | Bundhitwongrut, T., Saguensab, S., Thirakhupt, K., and Pauwels, O.S.G. (2008)A case of predation of the Water Monitor <i>Varanus salvator</i> on the Western Snail-eating Turtle <i>Malayemys macrocephala</i> (Reptilia: Varanidae & Bataguridae) in Bangkok                                                                                                   | 2008 | Thailand  | Snowball |
| 17 | Rathnayake, N., Herath, N., Hewamathes, K., and Jayalath, S. (2003). The thermal behaviour, diurnal activity pattern and body temperature of <i>Varanus salvator</i> in Central Sri Lanka. <i>Hamadryad</i> 27, 179–184                                                                                                                                         | 2003 | Sri Lanka | Snowball |
| 18 | Shine, R., Harlow, P. S., & Keogh, J. S. (1996). Commercial harvesting of giant lizards: the biology of water monitors <i>Varanus salvator</i> in southern Sumatra. <i>Biological Conservation</i> , 77(2-3), 125-134.                                                                                                                                          | 1996 | Indonesia | Scopus   |

|    |                                                                                                                                                                                                                                                                               |      |            |            |
|----|-------------------------------------------------------------------------------------------------------------------------------------------------------------------------------------------------------------------------------------------------------------------------------|------|------------|------------|
| 19 | Koch, A., Auliya, M., Schmitz, A., Kuch, U., & Böhme, W. (2007). Morphological studies on the systematics of South East Asian water monitors ( <i>Varanus salvator</i> Complex): nominotypic populations and taxonomic overview. <i>Mertensiella</i> , 16(109), e80.          | 2007 | Whole area | Other      |
| 20 | Shine, R., & Harlow, P. S. (1998). Ecological traits of commercially harvested water monitors, <i>Varanus salvator</i> , in northern Sumatra. <i>Wildlife Research</i> , 25(4), 437-447.                                                                                      | 1998 | Indonesia  | WOS/Scopus |
| 21 | De Lisle, H. F. (2007). Observations on <i>Varanus s. salvator</i> in North Sulawesi. <i>Biawak</i> , 1(2), 59-66.                                                                                                                                                            | 2007 | Indonesia  | Other      |
| 22 | Traeholt, C. (1994). The food and feeding behaviour of water monitor, <i>Varanus salvator</i> , in Malaysia. <i>Malayan Nature Journal (Malaysia)</i> .                                                                                                                       | 1994 | Malaysia   | Other      |
| 23 | Traeholt, C. (1994). Notes on the water monitor <i>Varanus salvator</i> as scavenger. <i>Malayan Nature Journal (Malaysia)</i> .                                                                                                                                              | 1994 | Malaysia   | Other      |
| 24 | Traeholt, C. (1993). Notes of the feeding behaviour of the water monitor, <i>Varanus salvator</i> . <i>Malayan Nature Journal (Malaysia)</i> .                                                                                                                                | 1993 | Malaysia   | Other      |
| 25 | Ritter, D. A. L. E. (1995). Epaxial muscle function during locomotion in a lizard ( <i>Varanus salvator</i> ) and the proposal of a key innovation in the vertebrate axial musculoskeletal system. <i>Journal of experimental biology</i> , 198(12), 2477-2490.               | 1995 | XX         | WOS/Scopus |
| 26 | Uyeda, L. I. N. D. A. (2009). Garbage appeal: relative abundance of water monitor lizards ( <i>Varanus salvator</i> ) correlates with presence of human food leftovers on Tinjil Island, Indonesia. <i>Biawak</i> , 3(1), 9-17.                                               | 2009 | Indonesia  | Other      |
| 27 | Gleeson, T. T. (1981). Preferred body temperature, aerobic scope, and activity capacity in the monitor lizard, <i>Varanus salvator</i> . <i>Physiological Zoology</i> , 54(4), 423-429.                                                                                       | 1981 | XX         | WOS        |
| 28 | Cota, M. I. C. H. A. E. L., Chan-Ard, T. A. N. Y. A., & Makchai, S. U. N. C. H. A. I. (2009). Geographical Distribution and regional variation of <i>Varanus salvator macromaculatus</i> in Thailand. <i>Biawak</i> , 3(4), 134-143.                                          | 2009 | Thailand   | Other      |
| 29 | Wikramanayake, E. D., & Dryden, G. L. (1993). Thermal Ecology of habitat and microhabitat use by sympatric <i>Varanus bengalensis</i> and <i>V. salvator</i> in Sri Lanka. <i>Copeia</i> , 709-714.                                                                           | 1993 | Sri Lanka  | WOS        |
| 30 | Akbar, N., Siddiqui, R., Sagathevan, K., Iqbal, M., & Khan, N. A. (2020). Gut bacteria of water monitor lizard ( <i>Varanus salvator</i> ) are a potential source of antibacterial compound (s). <i>Antibiotics</i> , 8(4), 164.                                              | 2019 | XX         | WOS/Scopus |
| 31 | Rahman, K. M., Rakhimov, I. I., & Khan, M. M. H. (2017). Activity budgets and Dietary investigations of <i>Varanus salvator</i> (Reptilia: Varanidae) in Karamjal ecotourism spot of Bangladesh Sundarbans mangrove forest. <i>Basic and Applied Herpetology</i> , 31, 45-56. | 2017 | Bangladesh | Scopus     |

|    |                                                                                                                                                                                                                                                                                                                                                                                                                                 |      |            |            |
|----|---------------------------------------------------------------------------------------------------------------------------------------------------------------------------------------------------------------------------------------------------------------------------------------------------------------------------------------------------------------------------------------------------------------------------------|------|------------|------------|
| 32 | Welton, L. J., Wood Jr, P. L., Oaks, J. R., Siler, C. D., & Brown, R. M. (2014). Fossil-calibrated phylogeny and historical biogeography of Southeast Asian water monitors (Varanus salvator Complex). <i>Molecular Phylogenetics and Evolution</i> , 74, 29-37.                                                                                                                                                                | 2014 | XX         | WOS/Scopus |
| 33 | Gleeson, T. T. (1983). A histochemical and enzymatic study of the muscle fiber types in the water monitor, Varanus salvator. <i>Journal of Experimental Zoology</i> , 227(2), 191-201.                                                                                                                                                                                                                                          | 1983 | XX         | WOS        |
| 34 | Uyeda, L. I. N. D. A., Iskandar, E. N. T. A. N. G., Purbatrapila, A. Z. H. A. R. I., Pamungkas, J. O. K. O., Wirsing, A., & Kyes, R. (2014). Water monitor lizard (Varanus salvator) satay: A treatment for skin ailments in Muarabinuangeun and Cisiuh, Indonesia. <i>Biawak</i> , 8(1), 35-38.                                                                                                                                | 2014 | Indonesia  | Other      |
| 35 | Uyeda, L. I. N. D. A., Iskandar, E. N. T. A. N. G., Wirsing, A. A. R. O. N., & Kyes, R. A. N. D. A. L. L. (2013). Nocturnal activity of Varanus salvator on Tinjil Island, Indonesia. <i>Biawak</i> , 7(1), 25-30.                                                                                                                                                                                                              | 2013 | Indonesia  | Other      |
| 36 | Chia, M. Y., Jeng, C. R., Hsiao, S. H., Lee, A. H., Chen, C. Y., & Pang, V. F. (2009). Entamoeba invadens myositis in a common water monitor lizard (Varanus salvator). <i>Veterinaryerinary pathology</i> , 46(4), 673-676.                                                                                                                                                                                                    | 2009 | XX         | WOS/Scopus |
| 37 | Mertens, R. (1942). Die familie der warane (Varanidae).                                                                                                                                                                                                                                                                                                                                                                         | 1942 | Whole area | Other      |
| 38 | Borden, R. O. S. S. (2007). Varanus salvator (Asian water monitor) migration. <i>Biawak</i> , 1(2), 84.                                                                                                                                                                                                                                                                                                                         | 2007 | Thailand   | Other      |
| 39 | Traeholt, C. A. R. L. (1995). Notes on the burrows of the water monitor lizard, Varanus salvator. <i>Malayan Nature Journal</i> , 49, 103-112.                                                                                                                                                                                                                                                                                  | 1995 | Malaysia   | Other      |
| 40 | Upton, S. J., & Zien, C. A. (1997). Description of a Giardia varani-like flagellate from a water monitor, Varanus salvator, from Malaysia. <i>The Journal of Parasitology</i> , 83(5), 970-971.                                                                                                                                                                                                                                 | 1997 | Malaysia   | WOS/Scopus |
| 41 | Chaiprasertsri, N., Uno, Y., Peyachoknagul, S., Prakhongcheep, O., Baicharoen, S., Charernsuk, S., ... & Srikulnath, K. (2013). Highly species-specific centromeric repetitive DNA sequences in lizards: molecular cytoGenetic characterization of a novel family of satellite DNA sequences isolated from the water monitor lizard (Varanus salvator macromaculatus, Platynota). <i>Journal of Heredity</i> , 104(6), 798-806. | 2013 | XX         | WOS/Scopus |
| 42 | Uyeda, L. T., Iskandar, E., Kyes, R. C., & Wirsing, A. J. (2015). Encounter rates, agonistic interactions, and social hierarchy among garbage-feeding water monitor lizards (Varanus salvator bivittatus) on Tinjil Island, Indonesia. <i>Herpetological Conservation and Biology</i> , 10(2), 753-764.                                                                                                                         | 2015 | Indonesia  | WOS/Scopus |

|    |                                                                                                                                                                                                                                                                                                                                                                                    |      |           |            |
|----|------------------------------------------------------------------------------------------------------------------------------------------------------------------------------------------------------------------------------------------------------------------------------------------------------------------------------------------------------------------------------------|------|-----------|------------|
| 43 | Fu, M., Yu, D., Peng, J., Wang, Y., Gao, S., Wang, L., ... & Gao, L. (2011). Isolation and characterization of novel microsatellite markers in Water monitor ( <i>Varanus salvator</i> ). <i>Conservation Genetics Resources</i> , 3(4), 777-779.                                                                                                                                  | 2011 | XX        | WOS/Scopus |
| 44 | Koch, A., & Böhme, W. (2010). Heading east: a new subspecies of <i>Varanus salvator</i> from Obi Island, Maluku Province, Indonesia, with a discussion about the easternmost natural occurrence of Southeast Asian water monitor lizards. <i>Russian Journal of Herpetology</i> , 17(4), 299-309.                                                                                  | 2010 | Indonesia | Other      |
| 45 | TI, C. T. (1997). Activity patterns of free-living water monitor lizards <i>Varanus salvator</i> . <i>Malayan Nature Journal</i> , 50, 301-315.                                                                                                                                                                                                                                    | 1997 | Malaysia  | Other      |
| 46 | Khadijah, S., Razak, N., Ward-Fear, G., Shine, R., & Natusch, D. J. (2019). Asian water monitors ( <i>Varanus salvator</i> ) remain common in Peninsular Malaysia, despite intense harvesting. <i>Wildlife Research</i> , 46(3), 265-275.                                                                                                                                          | 2019 | Malaysia  | WOS/Scopus |
| 47 | Mahfud, M., Ernawati, E., Mahmud, N. R. A., Budipitojo, T., & Wijayanto, H. (2020). An immunohistochemical study of endocrine cells in the digestive tract of <i>Varanus salvator</i> (Reptile: Varanidae). <i>Veterinaryerinary World</i> , 13(9), 1737.                                                                                                                          | 2020 | XX        | WOS/Scopus |
| 48 | Mazumder, M. K., Choudhury, A. S., Barbhuiya, R. A., Chakravarty, H., & Barbhuiya, B. (2020). The Ecology, Distribution, status, threats and Conservation of the Common Water Monitor ( <i>Varanus salvator</i> ) in the Dholeswari river of Assam, India. <i>Amphib. Reptile Conserv</i> , 14(1), 1-9.                                                                            | 2020 | India     | WOS/Scopus |
| 49 | Amarasinghe, A. A. T., Chathuranga, G., & Karunarathna, D. M. S. S. (2009). <i>Varanus salvator</i> (laurenti, 1768) in rathgama lagoon in Galle district, Sri Lanka. <i>Biawak</i> , 3(3), 81-84.                                                                                                                                                                                 | 2009 | Sri Lanka | Other      |
| 50 | Karunarathna, D. M. S. S., Amarasinghe, A. T., & Ekanayake, E. M. K. B. (2008). Observed predation on a suckermouth catfish ( <i>Hypostomus plecostomus</i> ) by a water monitor ( <i>Varanus salvator</i> ) in Bellanwila-Attidiya Sanctuary. <i>Biawak</i> , 2(1), 37-39.                                                                                                        | 2008 | Sri Lanka | Other      |
| 51 | Soopramanien, M., Khan, N. A., Sagathevan, K., & Siddiqui, R. (2021). Gut bacteria of <i>Varanus salvator</i> possess potential antitumour molecules. <i>International Microbiology</i> , 24(1), 47-56.                                                                                                                                                                            | 2021 | XX        | WOS/Scopus |
| 52 | Jeyamogan, S., Khan, N. A., Sagathevan, K., & Siddiqui, R. (2020). Anticancer Properties of Asian Water Monitor Lizard ( <i>Varanus salvator</i> ), Python ( <i>Malayopython reticulatus</i> ) and Tortoise ( <i>Cuora kamaroma amboinensis</i> ). <i>Anti-Cancer Agents in Medicinal Chemistry (Formerly Current Medicinal Chemistry-Anti-Cancer Agents)</i> , 20(13), 1558-1570. | 2020 | XX        | WOS/Scopus |

|    |                                                                                                                                                                                                                                                                                                                                                                                                 |      |           |            |
|----|-------------------------------------------------------------------------------------------------------------------------------------------------------------------------------------------------------------------------------------------------------------------------------------------------------------------------------------------------------------------------------------------------|------|-----------|------------|
| 53 | Zwart, P., & Harshbarger, J. C. (1972). Hematopoietic neoplasms in lizards: report of a typical case in <i>Hydrosaurus amboinensis</i> and of a probable case in <i>Varanus salvator</i> . <i>International journal of cancer</i> , 9(3), 548-553.                                                                                                                                              | 1972 | XX        | WOS        |
| 54 | Bhattacharya, S. H. R. E. Y. A., & Koch, A. N. D. R. É. (2018). Effects of traditional beliefs leading to Conservation of water monitor lizards ( <i>Varanus salvator</i> ) and threatened marshlands in West Bengal, India. <i>Herpetological Conservation and Biology</i> , 13(2), 408-414.                                                                                                   | 2018 | India     | WOS/Scopus |
| 55 | Doornbos, K., Sumrandee, C., Ruang–Areerate, T., Baimai, V., Trinachartvanit, W., & Ahantarig, A. (2013). <i>Rickettsia</i> sp. closely related to <i>Rickettsia raoultii</i> (Rickettsiales: Rickettsiaceae) in an <i>Amblyomma helvolum</i> (Acarina: Ixodidae) tick from a <i>Varanus salvator</i> (Squamata: Varanidae) in Thailand. <i>Journal of medical entomology</i> , 50(1), 217-220. | 2013 | Thailand  | Other      |
| 56 | Han, D., & Young, B. A. (2018). Biophysical heterogeneity in the tympanic membrane of the Asian water monitor lizard, <i>Varanus salvator</i> . <i>Zoomorphology</i> , 137(2), 337-348.                                                                                                                                                                                                         | 2018 | XX        | WOS/Scopus |
| 57 | Lauprasert, K., & THIRAKHUPT, K. (2001). Species diversity, Distribution and proposed status of monitor lizards (family Varanidae) in southern Thailand. <i>Tropical Natural History</i> , 1(1), 39-46.                                                                                                                                                                                         | 2001 | Thailand  | Other      |
| 58 | Hilditch, T. P., & Paul, H. (1937). The depot fat of <i>Varanus salvator</i> Laur. <i>Biochemical Journal</i> , 31(2), 227.                                                                                                                                                                                                                                                                     | 1937 | XX        | WOS        |
| 59 | Jeyamogan, S., Khan, N. A., & Siddiqui, R. (2021). Antitumour Activities of Selected Pure Compounds Identified from the Serum of <i>Crocodylus porosus</i> , <i>Malayopython reticulatus</i> , <i>Varanus salvator</i> and <i>Cuora kamaroma amboinensis</i> . <i>Asian Pacific Journal of Cancer Prevention</i> , 22(S1), 97-106.                                                              | 2021 | XX        | Scopus     |
| 60 | WICKRAMASINGHE, L. M., Kekulandala, L. D. C. B., Peabotuwege, P. K., & Karunaratna, D. M. S. S. (2010). A remarkable feeding Behavior and a new Distribution record of <i>Varanus salvator salvator</i> (Laurenti, 1768) in eastern Sri Lanka. <i>Biawak</i> , 4(3), 93-98.                                                                                                                     | 2010 | Sri Lanka | Other      |
| 61 | Rashid, S. M. A. (2004). <i>Population Ecology and management of water monitors, Varanus salvator (Laurenti 1768) at Sungei Buloh Wetland Reserve, Singapore</i> (Doctoral dissertation).                                                                                                                                                                                                       | 2004 | Singapore | Other      |
| 62 | Choudhury, A. S., & Choudhury, P. A. R. T. H. A. N. K. A. R. (2019). Cruelty to <i>Varanus</i> species of the Barak Valley, Assam, India. <i>Biawak</i> , 13(1), 50-53.                                                                                                                                                                                                                         | 2019 | India     | Other      |



|    |                                                                                                                                                                                                                                                                         |      |            |            |
|----|-------------------------------------------------------------------------------------------------------------------------------------------------------------------------------------------------------------------------------------------------------------------------|------|------------|------------|
| 63 | Han, D., & Young, B. A. (2016). Anatomical basis of dynamic modulation of tympanic tension in the water monitor lizard, <i>Varanus salvator</i> . <i>The Anatomical Record</i> , 299(9), 1270-1280.                                                                     | 2016 | XX         | WOS/Scopus |
| 64 | Rahman, K. M., Rakhimov, I. I., & Khan, M. M. H. (2017). Observation of a <i>Varanus salvator</i> consuming potentially dangerous waste refuse in Karamjal, Bangladesh Sundarbans mangrove forest. <i>Herpetological Bulletin</i> , 139, 33.                            | 2017 | Bangladesh | Scopus     |
| 65 | DUENGKAE, P. R. A. T. E. E. P., & Chuaynkern, Y. O. D. C. H. A. I. Y. (2009). A Road-killed Water Monitor <i>Varanus salvator macromaculatus</i> : Negative Impact from the Forest Route in Khao Yai National park, thailand. <i>Biawak</i> , 3(1), 23Y25.              | 2009 | Thailand   | Scopus     |
| 66 | Myers, G., Webb, T., Corbett, C. R., & Fout, C. (2011). Phacoemulsification for removal of bilateral cataracts in a black water monitor ( <i>Varanus salvator macromaculatus</i> ). <i>Journal of Herpetological Medicine and Surgery</i> , 21(4), 96-100.              | 2011 | XX         | Scopus     |
| 67 | Rieppel, O., & Labhardt, L. (1979). Mandibular mechanics in <i>Varanus niloticus</i> (Reptilia: Lacertilia). <i>Herpetologica</i> , 158-163.                                                                                                                            | 1979 | XX         | Scopus     |
| 68 | Wahyuni, S., Jalaluddin, M., & Adnyane, I. K. M. (2015). Studi histokimia sebaran karbohidrat usus biawak air ( <i>Varanus salvator</i> ). <i>Acta Veterinaria Indonesia</i> , 3(2), 77-84.                                                                             | 2015 | XX         | Other      |
| 69 | Fitzsimons, J. A. M. E. S., & Thomas, J. (2016). Feeding Behavior of an Asian water monitor <i>Varanus salvator macromaculatus</i> on a Bornean bearded pig <i>Sus barbatus barbatus</i> carcass. <i>Biawak</i> , 10(2), 48-50.                                         | 2016 | Malaysia   | Other      |
| 70 | Oo, S. S. L., & Bates, P. J. J. (2016). The rediscovery of the common water monitor lizard <i>Varanus salvator</i> (Squamata: Varanidae) in northern Myanmar. <i>Journal of Threatened Taxa</i> , 8(5), 8827-8828.                                                      | 2016 | Myanmar    | Scopus     |
| 71 | Mitchell, G. S., & Gleeson, T. T. (1985). Acid-base balance during lactic acid infusion in the lizard <i>Varanus salvator</i> . <i>Respiration physiology</i> , 60(2), 253-266.                                                                                         | 1985 | XX         | Scopus     |
| 72 | SRICHAIRAT, N., TAKSINTUM, W., & CHUMNANPUEN, P. (2018). Gross morphological structure of digestive system in water monitor lizard <i>Varanus salvator</i> (Squamata: Varanidae). <i>Walailak Journal of Science and Technology (WJST)</i> , 15(3), 245-253.            | 2018 | XX         | Scopus     |
| 73 | Self, J. T., & Kuntz, R. E. (1966). New Pentastomida. <i>Sambonia parapodum</i> n. sp. from <i>Varanus salvator</i> , and <i>Armillifer agkistrodontis</i> n. sp. from <i>Agkistrodon acutus</i> . <i>Transactions of the American Microscopical Society</i> , 256-260. | 1966 | XX         | Scopus     |
| 74 | CHUA, E. N. G. (2007). Feral Iguana attacks <i>Varanus salvator</i> at sungei Buloh Wetland reserve. <i>on the Cover: Varanus griseus griseus</i> , 1(1), 36.                                                                                                           | 2007 | Singapore  | Other      |

|    |                                                                                                                                                                                                                                                                                                                                                                                                                   |      |             |            |
|----|-------------------------------------------------------------------------------------------------------------------------------------------------------------------------------------------------------------------------------------------------------------------------------------------------------------------------------------------------------------------------------------------------------------------|------|-------------|------------|
| 75 | Samarasinghe, D. J., Koch, A., Harikrishnan, S., Manamendra-Arachchi, K., & Chandi, M. (2020). On the Taxonomy and Distribution of <i>Varanus salvator andamanensis</i> Deraniyagala, 1944 (Reptilia: Varanidae), including a redescription of the type specimens and a discussion about its allopatric co-occurrence with <i>V. s. macromaculatus</i> on the Nicobar Islands. <i>Zootaxa</i> , 4743(1), 061-074. | 2020 | India       | WOS        |
| 76 | Duengkae, P. R. A. T. E. P. (2008). Observation of <i>Varanus salvator</i> from Koh Tao Island in the Gulf of Thailand. <i>Biawak</i> , 2(4), 159-161.                                                                                                                                                                                                                                                            | 2008 | Thailand    | Other      |
| 77 | Platt, S. G., Win, M. M., & Rainwater, T. R. (2018). Additional field records provide further resolution of the Distribution of the Water Monitor <i>Varanus salvator</i> (Squamata: Varanidae) in northwestern Myanmar. <i>Journal of Threatened Taxa</i> , 10(10), 12425-12428.                                                                                                                                 | 2018 | Myanmar     | Scopus     |
| 78 | Burnell, A., Collins, S., & Young, B. A. (2012). The postpulmonary septum of <i>Varanus salvator</i> and its implication for Mosasaurian ventilation and physiology. <i>Bulletin de la Société Géologique de France</i> , 183(2), 159-169.                                                                                                                                                                        | 2012 | XX          | WOS/Scopus |
| 79 | Abdul, J., Hamzah, J., & Wan Abdullah, W. M. (1986). Preliminary study on the growth rate and movement of water monitor lizard ( <i>Varanus salvator</i> ) at Sungai Tembeling Taman Negara. <i>The Journal of Wildlife and Parks</i> , 5.                                                                                                                                                                        | 1986 | Malaysia    | Other      |
| 80 | Traeholt, C. (1995). A radio-telemetric study of the thermoregulation of free living water monitor lizards, <i>Varanus s. salvator</i> . <i>Journal of Comparative Physiology B</i> , 165(2), 125-131.                                                                                                                                                                                                            | 1995 | Malaysia    | WOS/Scopus |
| 81 | Dryden, G. L., Green, B., Wikramanayake, E. D., & Dryden, K. G. (1992). Energy and water turnover in two tropical varanid lizards, <i>Varanus bengalensis</i> and <i>V. salvator</i> . <i>Copeia</i> , 102-107.                                                                                                                                                                                                   | 1992 | Sri Lanka   | WOS        |
| 82 | Ritter, D. A. L. E. (1996). Axial muscle function during lizard locomotion. <i>Journal of experimental biology</i> , 199(11), 2499-2510.                                                                                                                                                                                                                                                                          | 1996 | XX          | WOS/Scopus |
| 83 | Zhang, H., Zhang, S., & Zhang, L. (2011). Two species of the genus <i>Kalicephalus</i> Molin, 1861 (Nematoda, Diaphanocephaloidea) from the water monitor, <i>Varanus salvator</i> (Laurenti, 1768) in Guangdong Province, China. <i>Acta Parasitologica</i> , 56(1), 48-53.                                                                                                                                      | 2011 | China       | WOS/Scopus |
| 84 | Villamor, C. I. (1993). Morphometry and Conservation status of water monitor lizard ( <i>Varanus salvator</i> ) in the Philippines. <i>Asian International Journal of Life Sciences</i> .                                                                                                                                                                                                                         | 1993 | Philippines | Other      |
| 85 | Traeholt, C. (1997). Effect of masking the parietal eye on the diurnal activity and body temperature of two sympatric species of monitor lizards, <i>Varanus s. salvator</i> and <i>Varanus b. nebulosus</i> . <i>Journal of Comparative Physiology B</i> , 167(3), 177-184.                                                                                                                                      | 1997 | XX          | WOS/Scopus |

|    |                                                                                                                                                                                                                                                                           |      |            |            |
|----|---------------------------------------------------------------------------------------------------------------------------------------------------------------------------------------------------------------------------------------------------------------------------|------|------------|------------|
| 86 | Uyeda, L. T., Iskandar, E., Kyes, R. C., & Wirsing, A. J. (2012). Proposed research on home ranges and resource use of the water monitor lizard, <i>Varanus salvator</i> . <i>The Forestry Chronicle</i> , 88(5), 542-546.                                                | 2012 | Indonesia  | WOS/Scopus |
| 87 | Acharjyo, L. N., Patnaik, M. M., & Patro, K. C. (1970). Treatment of diphyllbothrid tape worm infection in water monitors ( <i>Varanus salvator</i> ). <i>Orissa Veterinary Journal</i> , 5(2/3).                                                                         | 1970 | XX         | Other      |
| 88 | Mahaprom, R., Duengkhae, P., & Chaynkern, Y. (2015). Population density and morphometry analysis for sex determination in <i>Varanus salvator</i> from Bangkachao, Samutprakran Province. <i>Thai Journal of Forestry</i> , 34(3), 109-123.                               | 2015 | Thailand   | Other      |
| 89 | Goldthorpe, G., Shepherd, C., Hogg, S., & Leupen, B. (2010). Predation of water monitor lizard ( <i>Varanus salvator</i> ) by smooth-coated otter ( <i>Lutrogale perspicillata</i> ) in Peninsular Malaysia. <i>IUCN Otter Specialists Group Bulletin</i> , 27(2), 78-84. | 2010 | Malaysia   | Other      |
| 90 | Biswas, S. (1981). Some observations on nesting habits and biology of <i>Varanus salvator</i> (Laurenti) of Bhitarkanika Sanctuary, Orissa.                                                                                                                               | 1981 | India      | Other      |
| 91 | Liu, W., Li, Q. K., Shih, H. H., & Qiu, Z. Z. (2002). Meristocotyle provitellaria sp. nov. (Digenea: Meristocotylidae) from <i>Varanus salvator</i> in China. <i>ZOOLOGICAL STUDIES-TAIPEI</i> , 41(3), 283-287.                                                          | 2002 | China      | WOS/Scopus |
| 92 | Young, B. A., Dumais, J., John, N., Lyons, B., Macduff, A., Most, M., ... & Reiser, P. J. (2016). Functional segregation within the muscles of aquatic propulsion in the Asiatic water monitor ( <i>Varanus salvator</i> ). <i>Frontiers in physiology</i> , 7, 380.      | 2016 | XX         | WOS/Scopus |
| 93 | Mulyani, S., Masyitha, D., Wahyuni, S., & Jalaluddin, M. (2015). The anatomical and histological morphology of intestinal water monitor ( <i>Varanus salvator</i> ). <i>Jurnal Veterinaryeriner</i> , 16(2), 152-158.                                                     | 2015 | XX         | Other      |
| 94 | Fu, M., Yu, D., Wang, Y., & Peng, J. (2011). RAPD analysis for Genetic diversity of <i>Varanus salvator</i> . <i>Agricultural Science &amp; Technology-Hunan</i> , 12(3), 400-404.                                                                                        | 2011 | whole area | Other      |
| 95 | Agustin, A. L. D., Koesdarto, S., Lukiswanto, B. S., Suwanti, L. T., Arifin, Z., & Putranto, E. D. (2017). Morphological Identification Nematodes Tanqua tiara Found on Gastric <i>Varanus salvator</i> at East Java. <i>kNE Life Sciences</i> , 668-676.                 | 2017 | Indonesia  | Other      |
| 96 | Widyaningsih, R. (2020, April). Histological Structure of <i>Varanus Salvator</i> Intestine. In <i>Proceeding International Conference on Science and Engineering</i> (Vol. 3, pp. 121-124).                                                                              | 2020 | XX         | Other      |
| 97 | Young, B. A. (1988). The subclavian loop of <i>Varanus salvator</i> . <i>Copeia</i> , 1029-1034.                                                                                                                                                                          | 1988 | XX         | WOS        |
| 98 | Iqbal, M., Zockler, C., & Syroechkovskiy, E. (2013). White-bellied Sea-Eagle ' <i>Haliaeetus leucogaster</i> ' attempting to prey on water monitor ' <i>Varanus salvator</i> '. <i>Australian Field Ornithology</i> , 30(4), 206-209.                                     | 2013 | Indonesia  | Scopus     |

|     |                                                                                                                                                                                                                                                                                                                           |      |                                  |            |
|-----|---------------------------------------------------------------------------------------------------------------------------------------------------------------------------------------------------------------------------------------------------------------------------------------------------------------------------|------|----------------------------------|------------|
| 99  | Koch, A., Auliya, M., & Ziegler, T. (2010). Updated checklist of the living monitor lizards of the world (Squamata: Varanidae). <i>Bonn Zoological Bulletin</i> , 57(2), 127-136.                                                                                                                                         | 2010 | whole area                       | Other      |
| 100 | Dwyer, Q., & Pérez, M. (2007). Husbandry and reproduction of the black water monitor, <i>Varanus salvator komaini</i> . Cría y reproducción del monitor negro de agua, <i>Varanus salvator komaini</i> . <i>Biawak.</i> , 1(1), 13-20.                                                                                    | 2007 | Malaysia                         | Other      |
| 101 | Arida, E., Hidayat, A., Mulyadi, M., Maireda, N. L., Subasli, D. R., & Mumpuni, M. (2020). Consumption and Trade of Asian Water Monitor, <i>Varanus salvator</i> as Reliance on Wildlife for Livelihoods among Rural Communities in North Sumatra, Indonesia. <i>Journal of Tropical Ethnobiology</i> , 3(2), 81-92.      | 2020 | Indonesia                        | Other      |
| 102 | Lei, J., Booth, D. T., Rusli, M. U., & Zhang, Z. (2020). Spatial Ecology of Asian Water Monitors Adjacent to a Sea Turtle Nesting Beach. <i>Zoological Science</i> , 38(1).                                                                                                                                               | 2020 | Malaysia                         | WOS/Scopus |
| 103 | Lim, N., Kelt, D. A., Lim, K. K., & Bernard, H. (2020). Vertebrate scavengers control abundance of diarrheal-causing bacteria in tropical plantations.                                                                                                                                                                    | 2020 | Malaysia                         | WOS/Scopus |
| 104 | Yang, J. H., & Chan, B. P. L. (2020). Distribution, status, and Ecology of the water monitor ( <i>Varanus salvator</i> ) on Hainan Island, and the role of folklore in its Conservation. <i>HERPETOLOGICAL CONSERVATION AND BIOLOGY</i> , 15(2), 427-439.                                                                 | 2020 | China                            | WOS/Scopus |
| 105 | Kwak, M. L. (2020). A checklist and key to the tick fauna (Acari: Ixodidae, Argasidae) of Pulau Tioman, Malaysia. <i>Experimental and Applied Acarology</i> , 81(1), 51-58.                                                                                                                                               | 2020 | Malaysia                         | WOS/Scopus |
| 106 | Winnie, F. Y., Siddiqui, R., Sagathevan, K., & Khan, N. A. (2020). Identification of Antibacterial Molecule (s) from Animals Living in Polluted Environments. <i>Current pharmaceutical biotechnology</i> , 21(5), 425-437.                                                                                               | 2020 | XX                               | WOS/Scopus |
| 107 | Kaenkan, W., Nooma, W., Chelong, I. A., Baimai, V., Trinachartvanit, W., & Achantarig, A. (2020). Reptile-associated <i>Borrelia</i> spp. in <i>Amblyomma</i> ticks, Thailand. <i>Ticks and tick-borne diseases</i> , 11(1), 101315.                                                                                      | 2020 | Thailand                         | WOS/Scopus |
| 108 | de Chambrier, A., Brabec, J., Tran, B. T., & Scholz, T. (2019). Revision of <i>Acanthotaenia</i> von Linstow, 1903 (Cestoda: Proteocephalidae), parasites of monitors ( <i>Varanus</i> spp.), based on morphological and molecular data. <i>Parasitology research</i> , 118(6), 1761-1783.                                | 2019 | Sri Lanka, Malaysia, and Vietnam | WOS/Scopus |
| 109 | Jeyamogan, S., Khan, N. A., Sagathevan, K., & Siddiqui, R. (2019). Sera/organ lysates of selected animals living in polluted environments exhibit cytotoxicity against cancer cell lines. <i>Anti-Cancer Agents in Medicinal Chemistry (Formerly Current Medicinal Chemistry-Anti-Cancer Agents)</i> , 19(18), 2251-2268. | 2019 | XX                               | WOS/Scopus |
| 110 | Yao, Y. T., Du, Y., Fang, M. C., Lin, L. H., & Ji, X. (2019). Developmental stage does not affect resting metabolic rate in the monitor lizard, <i>Varanus salvator</i> . <i>Animal Biology</i> , 69(2), 199-212.                                                                                                         | 2019 | XX                               | WOS/Scopus |

|     |                                                                                                                                                                                                                                                                                                                     |      |           |            |
|-----|---------------------------------------------------------------------------------------------------------------------------------------------------------------------------------------------------------------------------------------------------------------------------------------------------------------------|------|-----------|------------|
| 111 | Koh, F. X., Panchadcharam, C., Sitam, F. T., & Tay, S. T. (2018). Molecular investigation of <i>Anaplasma</i> spp. in domestic and wildlife animals in Peninsular Malaysia. <i>Veterinary Parasitology: Regional Studies and Reports</i> , 13, 141-147.                                                             | 2018 | Malaysia  | WOS/Scopus |
| 112 | Shaney, K. J., Mostl, E., Hamidy, A., Kurniawan, N., Harvey, M. B., & Smith, E. N. (2017). Conservation challenges regarding species status assessments in biogeographically complex regions: examples from overexploited reptiles of Indonesia. <i>Oryx</i> , 51(4), 627-638.                                      | 2017 | Indonesia | WOS        |
| 113 | Twining, J. P., Bernard, H., & Ewers, R. M. (2017). Increasing land-use intensity reverses the relative occupancy of two quadrupedal scavengers. <i>PLoS one</i> , 12(5), e0177143.                                                                                                                                 | 2017 | Malaysia  | WOS/Scopus |
| 114 | F06 Morphological and molecular detection of <i>Blastocystis</i> in wildlife from Tioman Island, Malaysia                                                                                                                                                                                                           | 2017 | Malaysia  | WOS        |
| 115 | Kurniawan, N., Roziyah, N., Fauzi, M. A., & Kurnianto, A. S. (2017, November). From little known area to the extinction race: A survey of herpetofauna in Prebab, Kutai National Park (KNP), Indonesia. In <i>AIP Conference Proceedings</i> (Vol. 1908, No. 1, p. 020002). AIP Publishing LLC.                     | 2017 | Indonesia | WOS/Scopus |
| 116 | Gunawardena, S. A. (2016). Artefactual incised wounds due to postmortem predation by the Sri Lankan water monitor ( <i>kabaragoya</i> ). <i>Forensic science, Medicine, and pathology</i> , 12(3), 324-330.                                                                                                         | 2016 | XX        | WOS/Scopus |
| 117 | Bucklitsch, Y., Boehme, W., & Koch, A. (2016). Scale morphology and micro-structure of monitor lizards (Squamata: Varanidae: <i>Varanus</i> spp.) and their allies: implications for systematics, Ecology, and Conservation. <i>Zootaxa</i> , 4153(1), 1-192.                                                       | 2016 | XX        | WOS        |
| 118 | Uyeda, L. T., Iskandar, E., Purbatraptsila, A., Pamungkas, J., Wirsing, A., & Kyes, R. C. (2016). The role of traditional beliefs in Conservation of herpetofauna in Banten, Indonesia. <i>Oryx</i> , 50(2), 296-301.                                                                                               | 2016 | Indonesia | WOS/Scopus |
| 119 | Suzuki, D., Fuse, K., Aizu, M., Yoshizawa, S., Tanaka, W., Araya, K., & Praxaysombath, B. (2015). Reptile diversity in food markets in Laos. <i>Current herpetology</i> , 34(2), 112-119.                                                                                                                           | 2015 | Laos      | WOS/Scopus |
| 120 | Du, Y., Lin, L., Yao, Y., Lin, C., & Ji, X. (2014). Body size and reproductive tactics in varanid lizards. <i>Asian Herpetological Research</i> , 5(4), 263-270.                                                                                                                                                    | 2014 | XX        | WOS/Scopus |
| 121 | Salakij, C., Salakij, J., Prihirunkit, K., Narkkong, N. A., Sanyathitiseeree, P., & Kranjanapitukkul, K. (2014). Quantitative and qualitative morphologic, cytochemical, and ultrastructural characteristics of blood cells in captive Asian water monitors. <i>Veterinary clinical pathology</i> , 43(4), 538-546. | 2014 | XX        | WOS/Scopus |

|     |                                                                                                                                                                                                                                                                                                                                                                                                    |      |             |            |
|-----|----------------------------------------------------------------------------------------------------------------------------------------------------------------------------------------------------------------------------------------------------------------------------------------------------------------------------------------------------------------------------------------------------|------|-------------|------------|
| 122 | Young, B. A., Most, M. G., Dumais, J., John, N., Lyons, B., Macduff, A., & Reiser, P. J. (2014, January). Multiple perspectives of the functional divisions within the swimming muscles of the Asiatic water monitor ( <i>Varanus salvator</i> ). In <i>INTEGRATIVE AND COMPARATIVE BIOLOGY</i> (Vol. 54, pp. E231-E231). JOURNALS DEPT, 2001 EVANS RD, CARY, NC 27513 USA: OXFORD UNIV PRESS INC. | 2014 | XX          | WOS        |
| 123 | Srikulnath, K., Uno, Y., Nishida, C., & Matsuda, Y. (2013). Karyotype evolution in monitor lizards: cross-species chromosome mapping of cDNA reveals highly conserved synteny and gene order in the Toxicofera clade. <i>Chromosome Research</i> , <i>21</i> (8), 805-819.                                                                                                                         | 2013 | XX          | WOS/Scopus |
| 124 | Welton, L. J., Siler, C. D., Oaks, J. R., Diesmos, A. C., & Brown, R. M. (2013). Multilocus phylogeny and Bayesian estimates of species boundaries reveal hidden evolutionary relationships and cryptic diversity in Southeast Asian monitor lizards. <i>Molecular Ecology</i> , <i>22</i> (13), 3495-3510.                                                                                        | 2013 | XX          | WOS/Scopus |
| 125 | Kaiser, H., Taylor, D., Heacox, S., Landry, P., Sanchez, C., Ribeiro, A. V., ... & O'Shea, M. (2013). Conservation education in a post-conflict country: five herpetological case studies in Timor-Leste. <i>Salamandra</i> , <i>49</i> (2), 74-86.                                                                                                                                                | 2013 | Timor-Leste | WOS/Scopus |
| 126 | Koch, A., Ziegler, T., Boehme, W., Arida, E., & Auliya, M. (2013). Pressing problems: Distribution, threats, and Conservation status of the monitor lizards (Varanidae: <i>Varanus</i> spp.) of Southeast Asia and the Indo-Australian Archipelago. <i>Herpetological Conservation and Biology</i> , <i>8</i> (3), 1-62.                                                                           | 2013 | Whole area  | WOS/Scopus |
| 127 | Welton, L. J., Siler, C. D., Linkem, C. W., Diesmos, A. C., Diesmos, M. L., Sy, E., & Brown, R. M. (2013). Dragons in our midst: Phyloforensics of illegally traded Southeast Asian monitor lizards. <i>Biological Conservation</i> , <i>159</i> , 7-15.                                                                                                                                           | 2013 | Philippines | WOS        |
| 128 | Young, B. A., Dumais, J., McMahon, K., & Burnell, A. L. (2012, April). A tale of two tails: Swimming mechanics in <i>Varanus salvator</i> . In <i>Integrative and Comparative Biology</i> (Vol. 52, pp. E354-E354). JOURNALS DEPT, 2001 EVANS RD, CARY, NC 27513 USA: OXFORD UNIV PRESS INC.                                                                                                       | 2012 | XX          | WOS        |
| 129 | Nowak, M. (2010). Parasitisation and localisation of ticks [Acari: Ixodida] on exotic reptiles imported into Poland. <i>Annals of Agricultural and Environmental Medicine</i> , <i>17</i> (2), 237-242.                                                                                                                                                                                            | 2010 | XX          | WOS/Scopus |
| 130 | Amin, O. M., Van Ha, N., & Heckmann, R. A. (2008). New and already known acanthocephalans mostly from mammals in Vietnam, with descriptions of two new genera and species in Archiacanthocephala. <i>Journal of Parasitology</i> , <i>94</i> (1), 194-201.                                                                                                                                         | 2008 | Vietnam     | WOS/Scopus |

|     |                                                                                                                                                                                                                                                                                    |      |             |            |
|-----|------------------------------------------------------------------------------------------------------------------------------------------------------------------------------------------------------------------------------------------------------------------------------------|------|-------------|------------|
| 131 | Leong, T. M., & Lim, K. K. (2003). Herpetofaunal records from Fraser's Hill, Peninsular Malaysia, with larval descriptions of <i>Limnonectes nitidus</i> and <i>Theloderma asperum</i> (Amphibia: Ranidae and Rhacophoridae). <i>Raffles Bulletin of Zoology</i> , 51(1), 123-136. | 2003 | Malaysia    | WOS/Scopus |
| 132 | Struck, U., Altenbach, A. V., Gaulke, M., & Glaw, F. (2002). Tracing the Diet of the monitor lizard <i>Varanus mabitang</i> by stable isotope analyses ( $\delta^{15}N$ , $\delta^{13}C$ ). <i>Naturwissenschaften</i> , 89(10), 470-473.                                          | 2002 | XX          | WOS        |
| 133 | Andrews, H. V. (1995). Sexual maturation in <i>Varanus salvator</i> (Laurenti, 1768), with notes on growth and reproductive effort. <i>Herpetological journal</i> , 5(1), 189-194.                                                                                                 | 1995 | XX          | WOS/Scopus |
| 134 | Mardiastuti, A., MASY'UD, B. U. R. H. A. N. U. D. D. I. N., GINOGA, L. N., SASTRANEGARA, H., & SUTOPO, S. (2021). Wildlife species used as traditional Medicine by local people in Indonesia. <i>Biodiversitas Journal of Biological Diversity</i> , 22(1).                        | 2021 | Indonesia   | WOS/Scopus |
| 135 | Akbar, N., Siddiqui, R., Sagathevan, K., & Khan, N. A. (2020). Gut bacteria of animals living in polluted environments exhibit broad-spectrum antibacterial activities. <i>International Microbiology</i> , 23(4), 511-526.                                                        | 2020 | XX          | WOS/Scopus |
| 136 | Natusch, D. J., Aust, P. W., Khadiejah, S., Ithnin, H., Isa, A., Zamzuri, C. K., ... & DeNardo, D. F. (2020). Behavioral and corticosterone responses to carbon dioxide exposure in reptiles. <i>Plos one</i> , 15(10), e0240176.                                                  | 2020 | XX          | Scopus     |
| 137 | Rusil, M. U., Chen, G. N., Booth, D. T., & Lei, J. (2020). Diet preference and activity of Asian water monitor at Chagar Hutang turtle sanctuary. <i>Journal of Sustainability Science and Management</i> , 15(6), 68-74.                                                          | 2020 | Malaysia    | Scopus     |
| 138 | Amin, M. H. F. A., Andriyani, A. P., Sari, S. T., Pratiwi, I. A., Suhargo, L., & Irawan, B. First report of <i>Amblyomma</i> sp. collected from <i>Varanus salvator</i> in Baluran National Park Identified by DNA Barcoding.                                                      | 2019 | Indonesia   | Scopus     |
| 139 | Twining, J. P., & Koch, A. (2018). Dietary notes and foraging Ecology of south-east Asian water monitors ( <i>Varanus salvator</i> ) in Sabah, northern Borneo, Malaysia. <i>Herpetological Bulletin</i> , 143, 31.                                                                | 2018 | Malaysia    | Scopus     |
| 140 | Rahman, K. M., Rakhimov, I. I., & Khan, M. M. H. (2017). Public attitudes toward monitor lizards (reptilia: varanidae): A Conservation challenge in the human-dominated ecosystems of Bangladesh. <i>Annual Research &amp; Review in Biology</i> , 1-10.                           | 2017 | Bangladesh  | Scopus     |
| 141 | Tanalgo, K. C. (2017). Wildlife hunting by indigenous people in a Philippine protected area: a perspective from Mt. Apo National Park, Mindanao Island. <i>Journal of Threatened Taxa</i> , 9(6), 10307-10313.                                                                     | 2017 | Philippines | Scopus     |

|     |                                                                                                                                                                                                                                                                                                                                    |      |           |          |
|-----|------------------------------------------------------------------------------------------------------------------------------------------------------------------------------------------------------------------------------------------------------------------------------------------------------------------------------------|------|-----------|----------|
| 142 | Mohd Zain, S. N., Farah Haziqah, M. T., Woh, P. Y., Fazly Ann, Z., Vickneshwaran, M., Mohd Khalid, M. K. N., ... & Suresh, K. (2017). Morphological and molecular detection of Blastocystis in wildlife from Tioman Island, Malaysia. <i>Tropical BioMedicine</i> , 34(1), 249-255.                                                | 2017 | Malaysia  | Scopus   |
| 143 | Buatip, S., Karntanut, W., & Swennen, C. (2013). Nesting period and breeding success of the Little Egret <i>Egretta garzetta</i> in Pattani province, Thailand. <i>Forktail</i> , 29, 120â.                                                                                                                                        | 2013 | Malaysia  | Scopus   |
| 144 | Shahrudin, S., Jaafar, I. H., Rahim, N. D. A., & Akil, M. A. M. M. (2011). An annotated checklist of the herpetofauna of Beris Valley, Kedah, Malaysia. <i>Tropical life sciences research</i> , 22(1), 13.                                                                                                                        | 2011 | Malaysia  | Scopus   |
| 145 | Rawlinson, P. A., Widjaya, A. H. T., Hutchinson, M. N., & Brown, G. W. (1990). The terrestrial vertebrate fauna of the Krakatau Islands, Sunda Strait, 1883-1986. <i>Philosophical Transactions of the Royal Society of London. B, Biological Sciences</i> , 328(1245), 3-28.                                                      | 1990 | Indonesia | Scopus   |
| 146 | Chatterjee, A., & Bhattacharyya, S. (2015). Distribution and abundance of monitor lizards ( <i>Varanus</i> spp.) in human habitations of south west Bengal: People's tradition of coexisting with wildlife. <i>African Journal of Science and Research</i> , 3(7), 1-7.                                                            | 2015 | India     | Other    |
| 147 | Andrews, H. V., & Gaulke, M. (1990). Observations on the reproductive biology and growth of the water monitor ( <i>Varanus salvator</i> ) at the Madras Crocodile Bank. <i>Hamadryad</i> , 15(1), 1-5.                                                                                                                             | 1990 | India     | Snowball |
| 148 | Karunarathna, D. M. S. S., Surasinghe, T. D., De Silva, M. C., Madawala, M. B., Gabadage, D. E., & Botejue, W. M. S. (2015). Dietary habits of <i>Varanus salvator salvator</i> in Sri Lanka with a new record of predation on an introduced clown knifefish, <i>Chitala ornata</i> . <i>Herpetological Bulletin</i> , 133, 23-28. | 2015 | Sri Lanka | Scopus   |
